# Supplementary material for: Local control: a hub-based model for the c-di-GMP network
Source: PubMed Central journal article supplement (PMC11237430; doi:10.1128/msphere.00178-24), 2024-04-09
Supplement: msphere.00178-24-s0003.pdf [file msphere.00178-24-s0003.pdf]

## SUPPLEMENTAL TABLES

**Table S1:** AUC scores of logistic regression models (rows) for binary classification of three protein types (columns) participating in c-di-GMP signaling network. The associated P values for some of the data in this Table are shown in **Table S2**.

|                                   | <b>Dual</b> | <b>DGC</b> | <b>PDE</b> |
|-----------------------------------|-------------|------------|------------|
| <i>eigenvector</i>                | 0.7371324   | 0.4897959  | 0.6613636  |
| <i>PageRank</i>                   | 0.7738971   | 0.4642857  | 0.6704545  |
| <i>degree</i>                     | 0.7564338   | 0.4727891  | 0.6636364  |
| <i>betweenness</i>                | 0.7389706   | 0.5595238  | 0.5772727  |
| <i>avg nearest neighbor deg</i>   | 0.6783088   | 0.7763605  | 0.5409091  |
| <i>deg + PR + avg_nn_deg</i>      | 0.7628676   | 0.7534014  | 0.6795455  |
| <i>eigen + PR + btwnnss</i>       | 0.9246324   | 0.8979592  | 0.7431818  |
| <i>deg + PR + btwnnss</i>         | 0.8400735   | 0.6904762  | 0.6750000  |
| <i>deg + eigen + btwnnss</i>      | 0.8658088   | 0.8843537  | 0.7568182  |
| <i>eigen + deg + PR + btwnnss</i> | 0.9264706   | 0.8962585  | 0.7750000  |
| <i>all five centralities</i>      | 0.9191176   | 0.9047619  | 0.7840909  |

**Table S2:** P-values of each network feature in the three binary classifiers of corresponding protein types for select analyses shown in **Table S1**.

|                    | <b>Dual</b> | <b>DGC</b>  | <b>PDE</b>  |
|--------------------|-------------|-------------|-------------|
| <i>eigenvector</i> | 0.009702482 | 0.005065715 | 0.366506503 |
| <i>PageRank</i>    | 0.006520128 | 0.005662699 | 0.586409013 |
| <i>betweenness</i> | 0.02163542  | 0.01310859  | 0.86801627  |

**Table S3: Linear regression model with diffused gene additive log ratios<sup>a</sup>.**

|                                    | <b>coefficient</b> | <b>p-value</b> |
|------------------------------------|--------------------|----------------|
| <i>(Intercept)</i>                 | 0.0783049          | 2.01e-08 (***) |
| <i>wild type biofilm formation</i> | 1.0129670          | < 2e-16 (***)  |
| <i>betweenness</i>                 | 0.0001193          | 0.388          |
| <i>eigenvector centrality</i>      | 0.0750168          | 1.10e-08 (***) |
| <i>gene expression diffused</i>    | 0.0016159          | 0.521          |

<sup>a</sup>In various simple linear regression models, gene transcription data did not show any statistical significance, including the model above: *phenotype* ~ *wild type* + *betweenness* + *eigenvector centrality* + *gene data* done in a subset of 26 environments. Note: This subset of 26 environments was chosen at random, inclusion of the whole dataset introduces more noise and does not improve statistical significance of diffused gene data.
